# Supplementary material
Source: PubMed Central journal article supplement (PMC3090266)
Supplement: NIHMS277644-supplement-1_si_001.pdf [file NIHMS277644-supplement-1_si_001.pdf]

## Supporting Information

### **New Insights into the Binding Mode of Melanin Concentrating Hormone receptor-1 Antagonists: Homology Modeling and Explicit Membrane Molecular Dynamics Simulation Study**

*Mohamed A. Helal<sup>‡, #</sup>, Amar G. Chittiboyina,<sup>‡, #</sup> Mitchell A. Avery<sup>‡, ‡, †, \*</sup>*

<sup>‡</sup>Department of Medicinal Chemistry, School of Pharmacy, University of Mississippi,  
University, MS, 38677; <sup>#</sup>National Center for Natural Products Research; University of  
Mississippi, University, MS, 38677; <sup>†</sup>Department of Chemistry & Biochemistry, University of  
Mississippi, University, MS, 38677; <sup>\*</sup>Current Address: School of Pharmacy, Suez Canal  
University, Ismailia 41522, Egypt.



**Table S1:** Compounds used for the docking validation.

| Compound | Structure                                                                           | P IC <sub>50</sub> | Best Score | Average Score |
|----------|-------------------------------------------------------------------------------------|--------------------|------------|---------------|
| 1        | 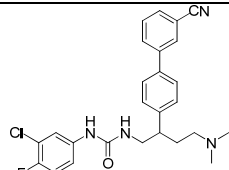   | 9.01               | 71.23      | 70.09         |
| 2        |    | 6.98               | 53.44      | 47.13         |
| 3        |    | 7.4                | 53.79      | 46.54         |
| 4        |    | 6.55               | 56.99      | 55.57         |
| 5        |   | 8.92               | 67.44      | 65.87         |
| 6        |  | 8.66               | 70.61      | 67.88         |
| 7        |  | 8.59               | 68.5       | 67.91         |
| 8        |  | 7.09               | 63.06      | 60.17         |
| 9        |  | 5.52               | 47.74      | 39.32         |
| 10       |  | 7.41               | 53.9       | 45.84         |

|                    |                                                                                     |      |               |               |
|--------------------|-------------------------------------------------------------------------------------|------|---------------|---------------|
| 11                 | 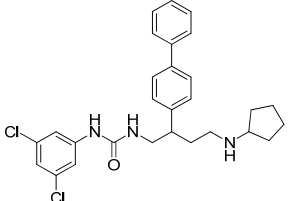   | 7.3  | 71.6          | 64.26         |
| 12                 |    | 6.85 | 54.02         | 51.09         |
| 13                 |    | 6.49 | 68.48         | 64.65         |
| 14                 |    | 6.05 | 57.09         | 55.02         |
| 15                 |    | 5.89 | 45.49         | 41.18         |
| 16                 |   | 7.68 | 65.13         | 56.14         |
| 17                 |  | 7.62 | 69.8          | 65.87         |
| 18                 |  | 6.52 | 38.26         | 29.15         |
| <b>Correlation</b> |                                                                                     |      | <b>0.6958</b> | <b>0.6982</b> |
